# Supplementary material
Source: publisher site journal article supplement (https://www.dovepress.com/article/542130)
Supplement: Supplementary file 1 [file Supplementary_materials_1_1.docx]

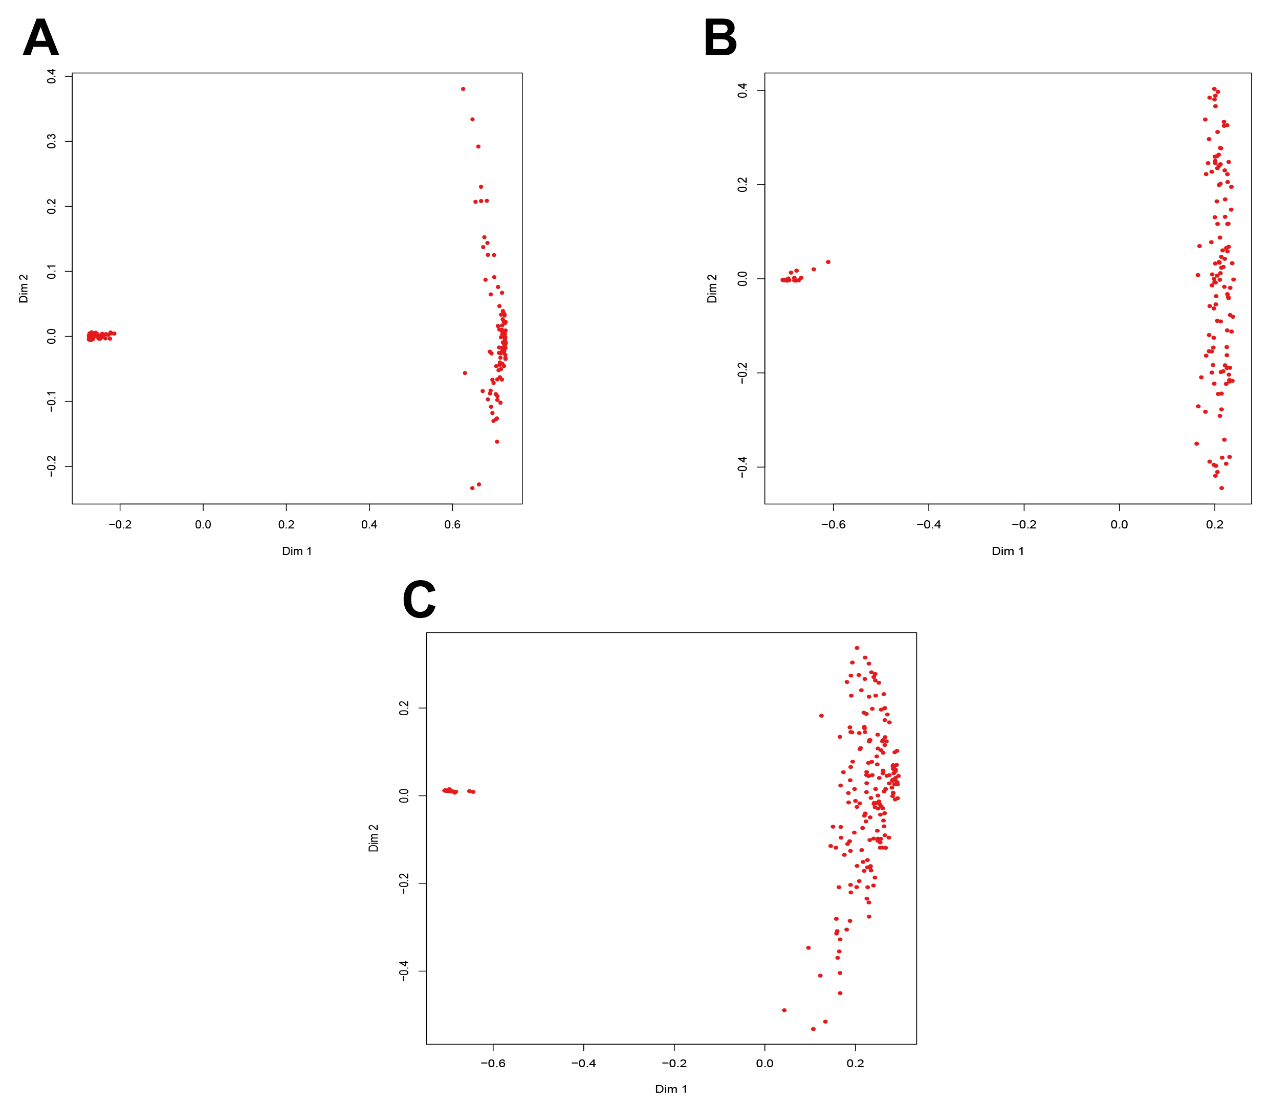


Supplementary figure 1. Distinguishing lateral efficacy maps of renal fibrosis patients based on RF prediction models. (a) Training set; (b) Internal testing set; (c) External test set. In fact, the left red and right red dots represent patients with renal fibrosis and non renal fibrosis, respectively.

Supplementary table 1. Analysis of baseline data for external validation Sets.

| Variables | Overall  (n=243) | Renal fibrosis (n=60) | Normal  (n=183) | P-value |
| --- | --- | --- | --- | --- |
| Sex (%) |  |  |  |  |
| Male | 123 (50.6) | 23 (38.3) | 100 (54.6) | 0.041 |
| Female | 120 (49.4) | 37 (61.7) | 83 (45.4) |  |
| Age (median [IQR]),year | 53.00 [44.50, 62.00] | 56.00 [48.00, 63.00] | 53.00 [43.50, 62.00] | 0.094 |
| BMI (median [IQR]),kg/m2 | 24.70 [22.20, 27.10] | 23.70 [22.40, 27.10] | 24.90 [22.00, 27.15] | 0.772 |
| Hypertension (%) |  |  |  |  |
| Yes | 125 (51.4) | 27 (45.0) | 98 (53.6) | 0.317 |
| No | 118 (48.6) | 33 (55.0) | 85 (46.4) |  |
| Diabetes (%) |  |  |  |  |
| Yes | 126 (51.9) | 31 (51.7) | 95 (51.9) | 1 |
| No | 117 (48.1) | 29 (48.3) | 88 (48.1) |  |
| eGFR (median [IQR]), mL/min/1.72 m2 | 37.50 [25.20, 50.15] | 77.15 [65.55, 88.47] | 31.30 [21.90, 40.10] | <0.001 |
| Cyst C (median [IQR]), mg/L | 1.56 [1.03, 2.05] | 1.71 [0.90, 2.19] | 1.53 [1.03, 2.00] | 0.551 |
| UTP (median [IQR]), g/d | 4.14 [2.16, 5.64] | 4.56 [2.38, 5.84] | 3.99 [1.96, 5.58] | 0.272 |
| Alb (median [IQR]), g/L | 25.85 [24.33, 27.08] | 25.30 [24.24, 27.27] | 25.95 [24.41, 27.05] | 0.6 |
| PTH (median [IQR]), pg/mL | 23.95 [17.52, 34.08] | 27.55 [18.15, 33.92] | 23.01 [17.41, 34.08] | 0.557 |
| Hb (median [IQR]), g/L | 93.00 [81.00, 101.50] | 97.00 [85.75, 102.00] | 91.00 [80.00, 101.00] | 0.059 |
| BNP (median [IQR]), pg/mL | 108.00 [67.00, 158.50] | 108.00 [66.75, 156.25] | 108.00 [67.50, 160.50] | 0.947 |
| UA (median [IQR]), μmol/L | 416.00 [368.50, 468.00] | 403.50 [366.75, 440.25] | 431.00 [369.50, 470.50] | 0.044 |
| Ca (median [IQR]), mmo/L | 1.29 [1.06, 1.65] | 1.38 [1.09, 1.72] | 1.26 [1.06, 1.64] | 0.224 |
| P (median [IQR]), mmo/L | 1.13 [0.81, 1.31] | 1.10 [0.77, 1.21] | 1.13 [0.82, 1.33] | 0.198 |
| NEU (median [IQR]), 10^9/L | 9.31 [7.86, 10.82] | 6.57 [6.18, 7.34] | 10.05 [8.84, 11.12] | <0.001 |
| PLT (median [IQR]), 10^9/L | 124.00 [104.00, 147.50] | 233.50 [179.75, 291.25] | 115.00 [101.00, 134.00] | <0.001 |
| MONO (median [IQR]), 10^9/L | 0.16 [0.10, 0.22] | 0.31 [0.17, 0.41] | 0.13 [0.08, 0.19] | <0.001 |
| LYM (median [IQR]), 10^9/L | 2.36 [2.02, 2.77] | 1.52 [1.09, 1.88] | 2.53 [2.24, 2.90] | <0.001 |
| AISI (median [IQR]) | 45.30 [28.05, 62.80] | 95.55 [79.72, 106.05] | 38.10 [24.20, 49.50] | <0.001 |
| ASM (median [IQR]) | 6.61 [5.11, 7.62] | 2.69 [2.03, 3.58] | 7.07 [6.10, 7.95] | <0.001 |
| Contrast (median [IQR]) | 8.27 [7.04, 9.61] | 4.48 [3.28, 5.42] | 9.00 [7.82, 9.96] | <0.001 |
| Correlation (median [IQR]) | 8.02 [6.90, 9.39] | 4.97 [4.22, 5.69] | 8.67 [7.80, 9.55] | <0.001 |
| Entropy (median [IQR]) | 108.00 [81.50, 132.00] | 50.50 [35.75, 67.00] | 121.00 [99.50, 139.00] | <0.001 |
| IDM (median [IQR]) | 7.69 [6.22, 9.13] | 4.89 [4.22, 5.59] | 8.31 [7.16, 9.46] | <0.001 |
| Energy (median [IQR]) | 5.43 [4.00, 6.67] | 5.88 [3.84, 7.01] | 5.41 [4.05, 6.51] | 0.366 |
| SE (median [IQR]) | 65.00 [41.00, 90.00] | 66.00 [39.00, 91.25] | 65.00 [43.50, 89.00] | 0.945 |
| DA (median [IQR]) | 1.26 [1.10, 1.42] | 1.29 [1.09, 1.38] | 1.26 [1.10, 1.43] | 0.88 |
| DV (median [IQR]) | 1.38 [0.78, 1.94] | 1.35 [0.78, 1.94] | 1.38 [0.76, 1.94] | 0.805 |
| IMC (median [IQR]) | 2.37 [1.96, 2.87] | 2.50 [1.96, 2.96] | 2.28 [1.96, 2.84] | 0.241 |

Abbreviation: IQR:interquartile range;BMI:body mass index;eGFR: estimated glomerular filtration rate; Cyst C: cystatin C; UTP: 24-h urinary total protein; Alb: albumin; PTH: Parathyroid hormone; Hb: hemoglobin; BNP: brain natriuretic peptide; UA: uric acid; Ca: calcium; P: phosphorus;NEU:neutrophil count;PLT: platelet count;MONO: monocyte count;LYM: lymphocyte count;AISI: Aggregate Index of Systemic Inflammation;ASM: Angular Second Moment;IDM: Inverse Difference Moment;SE: Sum Entropy;DA: Difference Average;DV: Difference Variance;IMC:Informational Measure of Correlation.

Supplementary table 2.The characteristics and algorithms of ultrasound radiomics parameters extracted based on CNN.

| Ultrasound radiomics characteristics | Subclass characteristics | CNN algorithms |
| --- | --- | --- |
| Morphological features | - Volume and surface area | For input data x, convolution kernel w, output feature map y, bias term b, the formula for convolution operation is:  Among them, i and j represent the position of the output feature map, k represents the channel index, and m and n represent the sliding position of the convolution kernel on the input data. |
| - Long diameter and short diameter |
| - Leaf division index |
| Strength characteristics | - Mean: Reflects the average level of grayscale values within the lesion, which can reflect the overall intensity of the lesion. |
| - Variance: Refers to the degree of dispersion of grayscale values within the lesion. The larger the variance, the greater the difference in grayscale values within the lesion and the higher the heterogeneity of the tissue. |
| - Skewness: Describes the symmetry of the distribution of grayscale values within the lesion. A positive skewness indicates a rightward shift in grayscale value distribution, while a negative skewness indicates a leftward shift. |
| - Kurtosis: reflects the steepness of the distribution of grayscale values within the lesion. The larger the kurtosis, the more concentrated the grayscale value distribution and the sharper the peak. |
| Texture features | - Gray level co-occurrence matrix (GLCM) features: including entropy, contrast, correlation, uniformity, etc. Entropy reflects the non-uniformity or randomness of gray levels; Contrast emphasizes the grayscale difference between pixel or voxel pairs; Correlation reflects the linear relationship between grayscale values; Uniformity reflects the uniformity or orderliness of gray levels. |
| - Gray run length matrix (GLRLM) features: such as run length, run percentage, short-term run emphasis, long-term run emphasis, etc. The run length reflects the spatial distribution of consecutive pixels with the same gray level in a certain direction; Run percentage evaluation is the percentage of pixels or voxels within the ROI of the run portion, reflecting the granularity. |
| - Gray Scale Region Matrix (GLSZM) feature: Based on similar principles to GLRLM, but a more uniform texture will result in a wider and flatter matrix. Its characteristics include regional non-uniformity, regional area non-uniformity, etc., which can reflect the non-uniformity of grayscale values and regional size within the lesion. |
| - Neighborhood Gray Difference Matrix (NGTDM) features: Quantify the total difference between the gray level of a pixel or voxel and the average gray level of its adjacent pixels or voxels within a predefined distance. The main characteristics of NGTDM include roughness, busyness, and complexity. |
| Wavelet features | - The low order features used to describe tumor texture extracted by transforming images using wavelet functions, such as energy and entropy after wavelet transform, can reflect the texture information of lesions at different scales. |

Supplementary table 3. Weight value of candidate variables for predicting renal fibrosis based on RFM algorithm

| Variables | %IncMSE | IncNodePurity |
| --- | --- | --- |
| AISI | 6.220484888 | 3.145750949 |
| ASM | 17.56710253 | 22.30808456 |
| Contrast | 17.97861436 | 23.77467127 |
| Correlation | 17.9385145 | 23.52365455 |
| Entropy | 6.586488058 | 3.330675294 |
| IDM | 18.30790401 | 23.5565925 |

Abbreviation: IncMSE: Increase in mean squared error; IncNodePurity: Increase in node purity; AISI: Aggregate Index of Systemic Inflammation;ASM: Angular Second Moment;IDM: Inverse Difference Moment.
